# Supplementary material for: Comparative 3-D Modeling of tmRNA
Source: PubMed Central journal article supplement (PMC1168896; doi:10.1186/1471-2199-6-14), 2005-06-15

tmRNA (*Bacillus anthracis*)

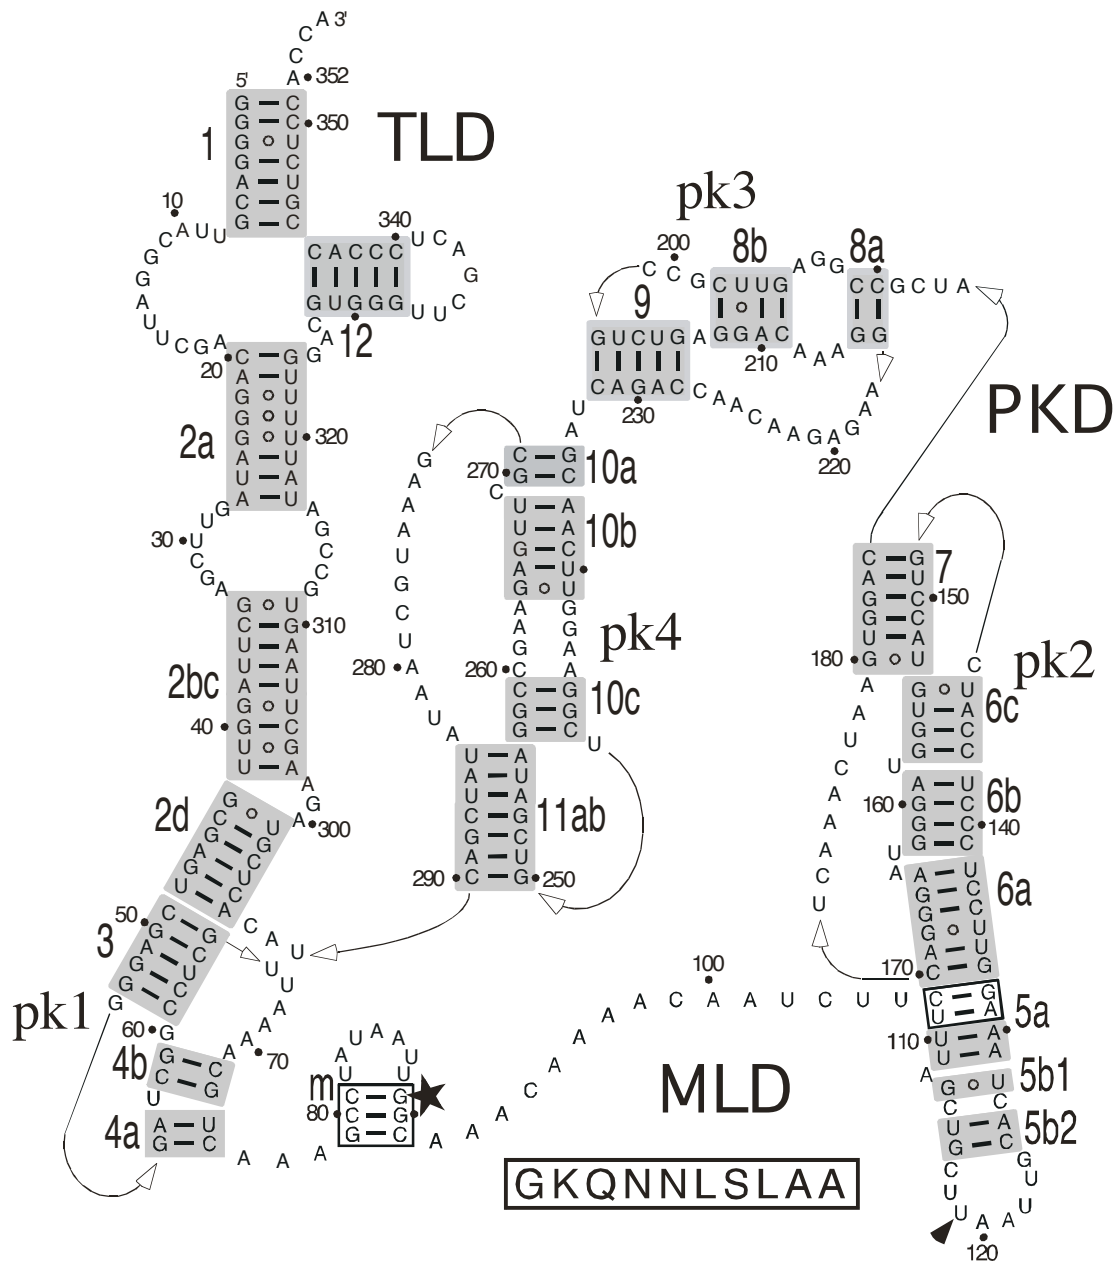

Supplement: 1471-2199-6-14-S5.pdf [file 1471-2199-6-14-S5.pdf]
